# Supplementary material for: The Acute Effects of Caffeinated Black Coffee on Cognition and Mood in Healthy Young and Older Adults
Source: Nutrients. 2018 Sep 30;10(10):1386. doi: 10.3390/nu10101386 (PMC6213082; doi:10.3390/nu10101386)
Supplement: Supplementary file 1 [file nutrients-10-01386-s001.pdf]

Supplementary Table 1 - Unadjusted values for salivary caffeine levels

| Task                         | Treatment            | Age   | Sex    | Baseline |      | Post-dose |      | F    | p      |           |       |                       |
|------------------------------|----------------------|-------|--------|----------|------|-----------|------|------|--------|-----------|-------|-----------------------|
|                              |                      |       |        | Mean     | SD   | Mean      | SD   |      |        |           |       |                       |
| Salivary caffeine -<br>µg/mL | Placebo              | Young | Male   | 0.13     | 0.19 | 0.09      | 0.10 | 0.98 | <0.001 | Treatment |       |                       |
|                              |                      |       | Female | 0.24     | 0.28 | 0.25      | 0.32 |      |        | Age       |       |                       |
|                              |                      | Older | Male   | 0.16     | 0.15 | 0.09      | 0.10 |      |        | 2.05      | 0.007 | Sex                   |
|                              |                      |       | Female | 0.13     | 0.07 | 0.13      | 0.07 |      |        |           |       | Treatment * Age       |
|                              | Decaffeinated coffee | Young | Male   | 0.11     | 0.10 | 0.11      | 0.11 | 1.21 | >0.1   |           |       | Treatment * Sex       |
|                              |                      |       | Female | 0.24     | 0.37 | 0.25      | 0.33 |      |        |           |       | Treatment * Age * Sex |
|                              |                      | Older | Male   | 0.19     | 0.16 | 0.16      | 0.11 |      |        | 0.14      | >0.1  |                       |
|                              |                      |       | Female | 0.21     | 0.24 | 0.29      | 0.35 |      |        |           |       |                       |
|                              | Caffeinated coffee   | Young | Male   | 0.08     | 0.12 | 0.84      | 0.21 | 0.38 | 0.064  |           |       |                       |
|                              |                      |       | Female | 0.18     | 0.28 | 1.36      | 0.64 |      |        |           |       |                       |
|                              |                      | Older | Male   | 0.22     | 0.26 | 1.15      | 0.61 |      |        |           |       |                       |
|                              |                      |       | Female | 0.20     | 0.23 | 1.13      | 0.56 |      |        |           |       |                       |

Supplementary Table 2 - Unadjusted scores for cognitive tasks

| Task<br>[Domain]                                                            | Treatment               | Age   | Sex    | Baseline |      | Post-dose |      | F     | p      |           |
|-----------------------------------------------------------------------------|-------------------------|-------|--------|----------|------|-----------|------|-------|--------|-----------|
|                                                                             |                         |       |        | Mean     | SD   | Mean      | SD   |       |        |           |
| Computerised<br>location<br>learning<br>displacement<br>score<br>[Learning] | Placebo                 | Young | Male   | 16.6     | 13.0 | 14        | 11   | 0.98  | >0.1   | Treatment |
|                                                                             |                         |       | Female | 15.4     | 9.7  | 15        | 8    |       |        |           |
|                                                                             |                         | Older | Male   | 29.5     | 18.7 | 28        | 16   |       |        |           |
|                                                                             |                         |       | Female | 35.6     | 16.5 | 35        | 17   |       |        |           |
|                                                                             | Decaffeinated<br>coffee | Young | Male   | 16.6     | 13.0 | 13        | 8    | 19.87 | <0.001 | Age       |
|                                                                             |                         |       | Female | 15.4     | 9.7  | 12        | 10   |       |        |           |
|                                                                             |                         | Older | Male   | 29.5     | 18.7 | 27        | 15   |       |        |           |
|                                                                             |                         |       | Female | 35.6     | 16.5 | 32        | 20   |       |        |           |
|                                                                             | Caffeinated<br>coffee   | Young | Male   | 16.6     | 13.0 | 11        | 8    | 0.38  | >0.1   | Sex       |
|                                                                             |                         |       | Female | 15.4     | 9.7  | 18        | 11   |       |        |           |
|                                                                             |                         | Older | Male   | 29.5     | 18.7 | 24        | 13   |       |        |           |
|                                                                             |                         |       | Female | 35.6     | 16.5 | 27        | 14   |       |        |           |
| Computerised<br>location<br>learning index<br>[Learning]                    | Placebo                 | Young | Male   | 0.8      | 0.2  | 0.86      | 0.20 | 0.20  | >0.1   | Treatment |
|                                                                             |                         |       | Female | 0.9      | 0.2  | 0.78      | 0.23 |       |        |           |
|                                                                             |                         | Older | Male   | 0.6      | 0.4  | 0.49      | 0.52 |       |        |           |
|                                                                             |                         |       | Female | 0.5      | 0.4  | 0.42      | 0.41 |       |        |           |
|                                                                             | Decaffeinated<br>coffee | Young | Male   | 0.8      | 0.2  | 0.86      | 0.21 | 12.61 | <0.001 | Age       |
|                                                                             |                         |       | Female | 0.9      | 0.2  | 0.83      | 0.22 |       |        |           |
|                                                                             |                         | Older | Male   | 0.6      | 0.4  | 0.50      | 0.39 |       |        |           |
|                                                                             |                         |       | Female | 0.5      | 0.4  | 0.49      | 0.24 |       |        |           |
|                                                                             | Caffeinated<br>coffee   | Young | Male   | 0.8      | 0.2  | 0.77      | 0.58 | 0.05  | >0.1   | Sex       |
|                                                                             |                         |       | Female | 0.9      | 0.2  | 0.79      | 0.33 |       |        |           |
|                                                                             |                         | Older | Male   | 0.6      | 0.4  | 0.54      | 0.36 |       |        |           |
|                                                                             |                         |       | Female | 0.5      | 0.4  | 0.56      | 0.30 |       |        |           |
| Immediate<br>word recall<br>correct -<br>number<br>[Episodic<br>memory]     | Placebo                 | Young | Male   | 7.7      | 2.2  | 7.5       | 1.6  | 2.91  | 0.059  | Treatment |
|                                                                             |                         |       | Female | 6.9      | 1.8  | 7.2       | 1.5  |       |        |           |
|                                                                             |                         | Older | Male   | 5.0      | 1.5  | 5.3       | 1.7  |       |        |           |
|                                                                             |                         |       | Female | 5.3      | 2.0  | 4.7       | 1.6  |       |        |           |
|                                                                             | Decaffeinated<br>coffee | Young | Male   | 7.5      | 2.3  | 7.1       | 1.9  | 21.59 | <0.001 | Age       |
|                                                                             |                         |       | Female | 7.8      | 1.4  | 6.0       | 1.3  |       |        |           |
|                                                                             |                         | Older | Male   | 5.4      | 1.8  | 5.3       | 1.9  |       |        |           |
|                                                                             |                         |       | Female | 5.9      | 2.2  | 4.8       | 1.9  |       |        |           |
|                                                                             | Caffeinated<br>coffee   | Young | Male   | 7.2      | 2.5  | 7.3       | 1.8  | 0.44  | >0.1   | Sex       |
|                                                                             |                         |       | Female | 7.2      | 1.5  | 6.5       | 1.6  |       |        |           |
|                                                                             |                         | Older | Male   | 5.3      | 1.6  | 4.7       | 1.5  |       |        |           |
|                                                                             |                         |       | Female | 5.3      | 1.7  | 4.2       | 1.8  |       |        |           |
| Immediate<br>word recall<br>error - number<br>[Episodic<br>memory]          | Placebo                 | Young | Male   | 0.2      | 0.4  | 0.3       | 0.6  | 2.52  | 0.085  | Treatment |
|                                                                             |                         |       | Female | 0.3      | 0.6  | 0.3       | 0.6  |       |        |           |
|                                                                             |                         | Older | Male   | 0.9      | 1.1  | 0.6       | 0.7  |       |        |           |
|                                                                             |                         |       | Female | 1.0      | 1.0  | 0.8       | 0.8  |       |        |           |
|                                                                             | Decaffeinated<br>coffee | Young | Male   | 0.2      | 0.4  | 0.4       | 0.6  | 6.02  | 0.017  | Age       |
|                                                                             |                         |       | Female | 0.2      | 0.4  | 0.6       | 0.9  |       |        |           |
|                                                                             |                         | Older | Male   | 1.3      | 1.0  | 0.9       | 1.2  |       |        |           |
|                                                                             |                         |       | Female | 0.8      | 1.1  | 1.4       | 1.3  |       |        |           |
|                                                                             | Caffeinated<br>coffee   | Young | Male   | 0.7      | 0.9  | 0.3       | 0.5  | 0.18  | >0.1   | Sex       |
|                                                                             |                         |       | Female | 0.3      | 0.6  | 0.6       | 0.7  |       |        |           |
|                                                                             |                         | Older | Male   | 0.8      | 0.7  | 0.9       | 1.1  |       |        |           |
|                                                                             |                         |       | Female | 0.8      | 0.9  | 1.2       | 1.2  |       |        |           |

|                                                           |                         |       |        |       |       |        |       |      |       |                       |
|-----------------------------------------------------------|-------------------------|-------|--------|-------|-------|--------|-------|------|-------|-----------------------|
| Simple<br>reaction time<br>(ms)<br>[Attention]            | Placebo                 | Young | Male   | 272.3 | 27.7  | 283.72 | 34.88 | 1.47 | >0.1  | Treatment             |
|                                                           |                         |       | Female | 263.3 | 30.3  | 273.03 | 34.46 |      |       |                       |
|                                                           |                         | Older | Male   | 302.6 | 49.5  | 314.22 | 41.61 |      |       |                       |
|                                                           |                         |       | Female | 299.3 | 57.7  | 307.06 | 60.31 |      |       |                       |
|                                                           | Decaffeinated<br>coffee | Young | Male   | 270.7 | 29.0  | 296.30 | 55.89 | 2.13 | >0.1  | Age                   |
|                                                           |                         |       | Female | 260.5 | 26.1  | 272.33 | 43.41 | 5.23 | 0.027 | Sex                   |
|                                                           |                         | Older | Male   | 292.2 | 29.5  | 303.52 | 38.91 | 1.22 | >0.1  | Treatment * Age       |
|                                                           |                         |       | Female | 305.8 | 115.7 | 299.54 | 97.82 | 0.94 | >0.1  | Treatment * Sex       |
|                                                           | Caffeinated<br>coffee   | Young | Male   | 270.0 | 23.3  | 277.00 | 29.96 | 0.04 | >0.1  | Treatment * Age * Sex |
|                                                           |                         |       | Female | 306.7 | 94.1  | 276.37 | 29.04 |      |       |                       |
|                                                           |                         | Older | Male   | 322.3 | 54.8  | 329.11 | 76.52 |      |       |                       |
|                                                           |                         |       | Female | 286.4 | 51.4  | 280.91 | 30.06 |      |       |                       |
| Digit vigilance<br>accuracy (%)<br>[Attention]            | Placebo                 | Young | Male   | 91.7  | 5.5   | 94.86  | 4.64  | 4.44 | 0.014 | Treatment             |
|                                                           |                         |       | Female | 93.3  | 8.6   | 91.28  | 13.29 |      |       |                       |
|                                                           |                         | Older | Male   | 95.0  | 5.1   | 95.21  | 5.65  |      |       |                       |
|                                                           |                         |       | Female | 95.7  | 5.3   | 92.22  | 10.26 |      |       |                       |
|                                                           | Decaffeinated<br>coffee | Young | Male   | 95.0  | 3.9   | 89.86  | 7.78  | 0.12 | >0.1  | Age                   |
|                                                           |                         |       | Female | 92.0  | 6.6   | 89.40  | 9.90  | 4.30 | 0.044 | Sex                   |
|                                                           |                         | Older | Male   | 94.0  | 7.2   | 94.19  | 7.99  | 2.45 | 0.092 | Treatment * Age       |
|                                                           |                         |       | Female | 95.6  | 5.4   | 93.78  | 8.53  | 1.83 | >0.1  | Treatment * Sex       |
|                                                           | Caffeinated<br>coffee   | Young | Male   | 93.8  | 6.7   | 95.70  | 5.16  | 0.64 | >0.1  | Treatment * Age * Sex |
|                                                           |                         |       | Female | 91.5  | 9.0   | 94.19  | 4.01  |      |       |                       |
|                                                           |                         | Older | Male   | 93.2  | 6.0   | 95.39  | 2.94  |      |       |                       |
|                                                           |                         |       | Female | 96.7  | 4.1   | 95.56  | 4.73  |      |       |                       |
| Digit vigilance<br>reaction time<br>(ms)<br>[Attention]   | Placebo                 | Young | Male   | 425.3 | 37.6  | 432.53 | 34.32 | 5.07 | 0.009 | Treatment             |
|                                                           |                         |       | Female | 400.2 | 36.4  | 418.39 | 39.57 |      |       |                       |
|                                                           |                         | Older | Male   | 437.8 | 36.2  | 454.29 | 22.01 |      |       |                       |
|                                                           |                         |       | Female | 427.2 | 35.0  | 435.10 | 43.59 |      |       |                       |
|                                                           | Decaffeinated<br>coffee | Young | Male   | 419.3 | 33.8  | 432.83 | 40.65 | 0.73 | >0.1  | Age                   |
|                                                           |                         |       | Female | 417.4 | 31.9  | 425.17 | 33.36 | 0.23 | >0.1  | Sex                   |
|                                                           |                         | Older | Male   | 441.7 | 21.6  | 442.01 | 32.65 | 0.63 | >0.1  | Treatment * Age       |
|                                                           |                         |       | Female | 426.3 | 38.5  | 432.88 | 31.45 | 0.16 | >0.1  | Treatment * Sex       |
|                                                           | Caffeinated<br>coffee   | Young | Male   | 419.6 | 40.6  | 417.33 | 34.95 | 0.83 | >0.1  | Treatment * Age * Sex |
|                                                           |                         |       | Female | 403.0 | 22.8  | 404.98 | 34.42 |      |       |                       |
|                                                           |                         | Older | Male   | 443.5 | 30.3  | 441.35 | 28.21 |      |       |                       |
|                                                           |                         |       | Female | 420.1 | 39.1  | 423.59 | 41.78 |      |       |                       |
| Digit vigilance<br>false alarm<br>(number)<br>[Attention] | Placebo                 | Young | Male   | 2.3   | 1.4   | 2      | 2     | 0.46 | >0.1  | Treatment             |
|                                                           |                         |       | Female | 1.6   | 1.1   | 1      | 1     |      |       |                       |
|                                                           |                         | Older | Male   | 3.1   | 2.2   | 2      | 3     |      |       |                       |
|                                                           |                         |       | Female | 2.4   | 2.1   | 2      | 2     |      |       |                       |
|                                                           | Decaffeinated<br>coffee | Young | Male   | 1.9   | 1.7   | 3      | 2     | 0.06 | >0.1  | Age                   |
|                                                           |                         |       | Female | 1.8   | 1.4   | 1      | 1     | 2.75 | >0.1  | Sex                   |
|                                                           |                         | Older | Male   | 3.5   | 3.0   | 2      | 2     | 1.50 | >0.1  | Treatment * Age       |
|                                                           |                         |       | Female | 1.9   | 2.0   | 1      | 1     | 1.79 | >0.1  | Treatment * Sex       |
|                                                           | Caffeinated<br>coffee   | Young | Male   | 1.9   | 1.6   | 1      | 2     | 1.17 | >0.1  | Treatment * Age * Sex |
|                                                           |                         |       | Female | 1.4   | 1.1   | 1      | 1     |      |       |                       |
|                                                           |                         | Older | Male   | 2.8   | 2.7   | 2      | 2     |      |       |                       |
|                                                           |                         |       | Female | 1.8   | 2.1   | 2      | 2     |      |       |                       |
| Numeric<br>working                                        | Placebo                 | Young | Male   | 96.0  | 4.4   | 95.90  | 2.62  | 1.72 | >0.1  | Treatment             |
|                                                           |                         |       | Female | 93.8  | 5.1   | 93.68  | 5.73  |      |       |                       |
|                                                           |                         | Older | Male   | 96.6  | 2.9   | 96.83  | 3.92  |      |       |                       |
|                                                           |                         |       | Female | 91.7  | 6.5   | 91.81  | 8.41  |      |       |                       |

|                                                                                   |                         |        |                                                                              |         |       |        |        |                                              |                                                |                                                                                        |      |                       |       |        |        |                                      |                                      |                                                                                        |
|-----------------------------------------------------------------------------------|-------------------------|--------|------------------------------------------------------------------------------|---------|-------|--------|--------|----------------------------------------------|------------------------------------------------|----------------------------------------------------------------------------------------|------|-----------------------|-------|--------|--------|--------------------------------------|--------------------------------------|----------------------------------------------------------------------------------------|
| memory<br>accuracy (%)<br>[Working<br>memory]                                     | Decaffeinated<br>coffee | Young  | Male                                                                         | 96.0    | 4.5   | 96.88  | 3.33   | 1.35                                         | >0.1<br>0.041<br>>0.1<br>>0.1<br>>0.1<br>0.70  | Age<br>Sex<br>Treatment * Age<br>Treatment * Sex<br>Treatment * Age * Sex              |      |                       |       |        |        |                                      |                                      |                                                                                        |
|                                                                                   |                         |        | Female                                                                       | 95.4    | 3.7   | 94.36  | 5.20   | 4.53                                         |                                                |                                                                                        |      |                       |       |        |        |                                      |                                      |                                                                                        |
|                                                                                   |                         | Older  | Male                                                                         | 95.8    | 4.0   | 95.87  | 2.67   | 1.37                                         |                                                |                                                                                        | >0.1 | Treatment * Age       |       |        |        |                                      |                                      |                                                                                        |
|                                                                                   |                         |        | Female                                                                       | 93.6    | 6.8   | 94.31  | 5.50   | 0.04                                         |                                                |                                                                                        | >0.1 | Treatment * Sex       |       |        |        |                                      |                                      |                                                                                        |
|                                                                                   | Caffeinated<br>coffee   | Young  | Male                                                                         | 96.1    | 3.3   | 96.04  | 3.47   | 0.70                                         |                                                |                                                                                        | >0.1 | Treatment * Age * Sex |       |        |        |                                      |                                      |                                                                                        |
|                                                                                   |                         |        | Female                                                                       | 94.4    | 3.6   | 94.27  | 5.79   |                                              |                                                |                                                                                        |      |                       |       |        |        |                                      |                                      |                                                                                        |
|                                                                                   |                         | Older  | Male                                                                         | 95.6    | 4.3   | 98.18  | 2.25   |                                              |                                                |                                                                                        |      |                       |       |        |        |                                      |                                      |                                                                                        |
|                                                                                   |                         |        | Female                                                                       | 91.7    | 8.3   | 94.38  | 6.72   |                                              |                                                |                                                                                        |      |                       |       |        |        |                                      |                                      |                                                                                        |
|                                                                                   |                         |        | Numeric<br>working<br>memory<br>reaction time<br>(ms)<br>[Working<br>memory] | Placebo | Young | Male   | 701.1  |                                              |                                                |                                                                                        |      |                       | 81.2  | 712.38 | 81.34  | 1.67<br>0.75<br>0.79<br>0.83<br>0.11 | >0.1<br>>0.1<br>>0.1<br>>0.1<br>>0.1 | Treatment<br>Age<br>Sex<br>Treatment * Age<br>Treatment * Sex<br>Treatment * Age * Sex |
|                                                                                   |                         |        |                                                                              |         |       | Female | 659.0  |                                              |                                                |                                                                                        |      |                       | 108.2 | 645.88 | 122.07 |                                      |                                      |                                                                                        |
| Older                                                                             | Male                    | 976.3  |                                                                              |         | 241.3 | 953.32 | 244.81 |                                              |                                                |                                                                                        |      |                       |       |        |        |                                      |                                      |                                                                                        |
|                                                                                   | Female                  | 876.3  |                                                                              |         | 165.1 | 866.11 | 192.35 |                                              |                                                |                                                                                        |      |                       |       |        |        |                                      |                                      |                                                                                        |
| Decaffeinated<br>coffee                                                           | Young                   | Male   |                                                                              | 752.4   | 124.2 | 709.95 | 141.99 |                                              |                                                |                                                                                        |      |                       |       |        |        |                                      |                                      |                                                                                        |
|                                                                                   |                         | Female |                                                                              | 635.9   | 96.5  | 652.00 | 112.14 |                                              |                                                |                                                                                        |      |                       |       |        |        |                                      |                                      |                                                                                        |
|                                                                                   | Older                   | Male   |                                                                              | 995.5   | 218.8 | 951.37 | 225.64 |                                              |                                                |                                                                                        |      |                       |       |        |        |                                      |                                      |                                                                                        |
|                                                                                   |                         | Female |                                                                              | 848.8   | 188.1 | 851.18 | 208.76 |                                              |                                                |                                                                                        |      |                       |       |        |        |                                      |                                      |                                                                                        |
| Caffeinated<br>coffee                                                             | Young                   | Male   |                                                                              | 698.3   | 62.9  | 682.82 | 64.63  |                                              |                                                |                                                                                        |      |                       |       |        |        |                                      |                                      |                                                                                        |
|                                                                                   |                         | Female |                                                                              | 658.6   | 128.9 | 641.04 | 130.71 |                                              |                                                |                                                                                        |      |                       |       |        |        |                                      |                                      |                                                                                        |
|                                                                                   | Older                   | Male   |                                                                              | 965.2   | 185.2 | 900.53 | 211.73 |                                              |                                                |                                                                                        |      |                       |       |        |        |                                      |                                      |                                                                                        |
|                                                                                   |                         | Female |                                                                              | 894.6   | 172.6 | 837.84 | 155.39 |                                              |                                                |                                                                                        |      |                       |       |        |        |                                      |                                      |                                                                                        |
| Verbal fluency<br>(number)<br>[Language]                                          | Placebo                 | Young  | Male                                                                         | 11.7    | 2.9   | 13.8   | 2.2    | 0.01<br>0.88<br>0.00<br>0.59<br>0.45<br>0.10 | >0.1<br>>0.1<br>>0.1<br>>0.1<br>>0.1<br>>0.1   | Treatment<br>Age<br>Sex<br>Treatment * Age<br>Treatment * Sex<br>Treatment * Age * Sex |      |                       |       |        |        |                                      |                                      |                                                                                        |
|                                                                                   |                         |        | Female                                                                       | 13.2    | 3.1   | 14.0   | 4.0    |                                              |                                                |                                                                                        |      |                       |       |        |        |                                      |                                      |                                                                                        |
|                                                                                   |                         | Older  | Male                                                                         | 10.4    | 2.9   | 12.6   | 2.4    |                                              |                                                |                                                                                        |      |                       |       |        |        |                                      |                                      |                                                                                        |
|                                                                                   |                         |        | Female                                                                       | 12.2    | 3.1   | 13.4   | 2.5    |                                              |                                                |                                                                                        |      |                       |       |        |        |                                      |                                      |                                                                                        |
|                                                                                   | Decaffeinated<br>coffee | Young  | Male                                                                         | 12.1    | 3.2   | 13.8   | 2.2    |                                              |                                                |                                                                                        |      |                       |       |        |        |                                      |                                      |                                                                                        |
|                                                                                   |                         |        | Female                                                                       | 13.2    | 3.5   | 14.6   | 3.0    |                                              |                                                |                                                                                        |      |                       |       |        |        |                                      |                                      |                                                                                        |
|                                                                                   |                         | Older  | Male                                                                         | 12.1    | 2.5   | 12.8   | 2.9    |                                              |                                                |                                                                                        |      |                       |       |        |        |                                      |                                      |                                                                                        |
|                                                                                   |                         |        | Female                                                                       | 12.9    | 2.9   | 13.6   | 3.3    |                                              |                                                |                                                                                        |      |                       |       |        |        |                                      |                                      |                                                                                        |
|                                                                                   | Caffeinated<br>coffee   | Young  | Male                                                                         | 12.1    | 2.5   | 13.9   | 3.2    |                                              |                                                |                                                                                        |      |                       |       |        |        |                                      |                                      |                                                                                        |
|                                                                                   |                         |        | Female                                                                       | 12.0    | 2.9   | 13.2   | 3.9    |                                              |                                                |                                                                                        |      |                       |       |        |        |                                      |                                      |                                                                                        |
|                                                                                   |                         | Older  | Male                                                                         | 10.9    | 3.8   | 13.1   | 4.0    |                                              |                                                |                                                                                        |      |                       |       |        |        |                                      |                                      |                                                                                        |
|                                                                                   |                         |        | Female                                                                       | 11.4    | 2.7   | 13.4   | 2.8    |                                              |                                                |                                                                                        |      |                       |       |        |        |                                      |                                      |                                                                                        |
| Rapid visual<br>information<br>processing<br>accuracy (%)<br>[Attention]          | Placebo                 | Young  | Male                                                                         | 62.7    | 16.2  | 60.2   | 20.2   | 2.83<br>0.14<br>0.69<br>0.68<br>0.04<br>2.35 | 0.064<br>>0.1<br>>0.1<br>>0.1<br>>0.1<br>0.079 | Treatment<br>Age<br>Sex<br>Treatment * Age<br>Treatment * Sex<br>Treatment * Age * Sex |      |                       |       |        |        |                                      |                                      |                                                                                        |
|                                                                                   |                         |        | Female                                                                       | 63.7    | 22.6  | 66.5   | 19.9   |                                              |                                                |                                                                                        |      |                       |       |        |        |                                      |                                      |                                                                                        |
|                                                                                   |                         | Older  | Male                                                                         | 43.2    | 23.9  | 48.0   | 24.6   |                                              |                                                |                                                                                        |      |                       |       |        |        |                                      |                                      |                                                                                        |
|                                                                                   |                         |        | Female                                                                       | 65.9    | 19.7  | 67.3   | 22.6   |                                              |                                                |                                                                                        |      |                       |       |        |        |                                      |                                      |                                                                                        |
|                                                                                   | Decaffeinated<br>coffee | Young  | Male                                                                         | 64.4    | 16.4  | 59.8   | 18.3   |                                              |                                                |                                                                                        |      |                       |       |        |        |                                      |                                      |                                                                                        |
|                                                                                   |                         |        | Female                                                                       | 62.5    | 21.2  | 63.5   | 21.0   |                                              |                                                |                                                                                        |      |                       |       |        |        |                                      |                                      |                                                                                        |
|                                                                                   |                         | Older  | Male                                                                         | 43.9    | 25.7  | 48.2   | 28.3   |                                              |                                                |                                                                                        |      |                       |       |        |        |                                      |                                      |                                                                                        |
|                                                                                   |                         |        | Female                                                                       | 68.0    | 14.9  | 66.8   | 24.1   |                                              |                                                |                                                                                        |      |                       |       |        |        |                                      |                                      |                                                                                        |
|                                                                                   | Caffeinated<br>coffee   | Young  | Male                                                                         | 64.4    | 16.6  | 71.4   | 14.8   |                                              |                                                |                                                                                        |      |                       |       |        |        |                                      |                                      |                                                                                        |
|                                                                                   |                         |        | Female                                                                       | 65.6    | 22.7  | 68.8   | 22.6   |                                              |                                                |                                                                                        |      |                       |       |        |        |                                      |                                      |                                                                                        |
|                                                                                   |                         | Older  | Male                                                                         | 48.4    | 28.2  | 49.5   | 32.9   |                                              |                                                |                                                                                        |      |                       |       |        |        |                                      |                                      |                                                                                        |
|                                                                                   |                         |        | Female                                                                       | 62.2    | 23.3  | 69.2   | 17.2   |                                              |                                                |                                                                                        |      |                       |       |        |        |                                      |                                      |                                                                                        |
| Rapid visual<br>information<br>processing<br>reaction time<br>(ms)<br>[Attention] | Placebo                 | Young  | Male                                                                         | 476.9   | 32.7  | 482.98 | 36.15  | 3.77<br>6.86<br>1.52<br>1.36                 | 0.026<br>0.011<br>>0.1<br>>0.1<br>>0.1         | Treatment<br>Age<br>Sex<br>Treatment * Age<br>Treatment * Sex                          |      |                       |       |        |        |                                      |                                      |                                                                                        |
|                                                                                   |                         |        | Female                                                                       | 471.8   | 46.3  | 481.24 | 37.17  |                                              |                                                |                                                                                        |      |                       |       |        |        |                                      |                                      |                                                                                        |
|                                                                                   |                         | Older  | Male                                                                         | 532.9   | 54.5  | 522.35 | 46.04  |                                              |                                                |                                                                                        |      |                       |       |        |        |                                      |                                      |                                                                                        |
|                                                                                   |                         |        | Female                                                                       | 529.0   | 71.1  | 545.54 | 76.89  |                                              |                                                |                                                                                        |      |                       |       |        |        |                                      |                                      |                                                                                        |
|                                                                                   | Decaffeinated<br>coffee | Young  | Male                                                                         | 497.5   | 29.5  | 487.98 | 44.69  |                                              |                                                |                                                                                        |      |                       |       |        |        |                                      |                                      |                                                                                        |
|                                                                                   |                         |        | Female                                                                       | 467.0   | 52.3  | 474.42 | 46.32  |                                              |                                                |                                                                                        |      |                       |       |        |        |                                      |                                      |                                                                                        |
|                                                                                   |                         | Older  | Male                                                                         | 524.4   | 64.1  | 524.59 | 53.94  |                                              |                                                |                                                                                        |      |                       |       |        |        |                                      |                                      |                                                                                        |
|                                                                                   |                         |        | Female                                                                       | 535.0   | 71.9  | 529.21 | 59.04  |                                              |                                                |                                                                                        |      |                       |       |        |        |                                      |                                      |                                                                                        |

|                                                                      |                      |       |        |       |      |        |       |       |       |                       |
|----------------------------------------------------------------------|----------------------|-------|--------|-------|------|--------|-------|-------|-------|-----------------------|
|                                                                      | Caffeinated coffee   | Young | Male   | 484.1 | 30.9 | 472.74 | 31.10 | 1.38  | >0.1  | Treatment * Age * Sex |
|                                                                      |                      |       | Female | 474.1 | 57.4 | 452.94 | 45.33 |       |       |                       |
|                                                                      |                      | Older | Male   | 516.5 | 41.2 | 513.70 | 39.15 |       |       |                       |
|                                                                      |                      |       | Female | 528.4 | 63.8 | 526.51 | 67.13 |       |       |                       |
| Rapid visual information processing false alarm (number) [Attention] | Placebo              | Young | Male   | 2.2   | 2.3  | 3      | 3     |       |       |                       |
|                                                                      |                      |       | Female | 3.4   | 4.4  | 1      | 2     |       |       |                       |
|                                                                      |                      | Older | Male   | 4.9   | 5.9  | 4      | 5     |       |       |                       |
|                                                                      |                      |       | Female | 3.4   | 2.8  | 3      | 3     | 0.14  | >0.1  | Treatment             |
|                                                                      | Decaffeinated coffee | Young | Male   | 2.6   | 1.7  | 3      | 2     | 2.50  | >0.1  | Age                   |
|                                                                      |                      |       | Female | 1.7   | 3.3  | 2      | 3     | 0.50  | >0.1  | Sex                   |
|                                                                      |                      | Older | Male   | 3.6   | 5.1  | 3      | 4     | 2.23  | >0.1  | Treatment * Age       |
|                                                                      |                      |       | Female | 4.0   | 3.2  | 4      | 3     | 4.55  | 0.013 | Treatment * Sex       |
|                                                                      | Caffeinated coffee   | Young | Male   | 3.4   | 3.2  | 2      | 2     | 1.59  | >0.1  | Treatment * Age * Sex |
|                                                                      |                      |       | Female | 2.3   | 2.8  | 2      | 2     |       |       |                       |
|                                                                      |                      | Older | Male   | 4.4   | 6.6  | 4      | 5     |       |       |                       |
|                                                                      |                      |       | Female | 2.4   | 2.2  | 4      | 3     |       |       |                       |
| Delayed word recall correct (number) [Episodic memory]               | Placebo              | Young | Male   | 5.4   | 2.2  | 4.1    | 2.0   |       |       |                       |
|                                                                      |                      |       | Female | 4.6   | 1.7  | 3.2    | 2.3   |       |       |                       |
|                                                                      |                      | Older | Male   | 3.0   | 2.3  | 2.2    | 1.9   |       |       |                       |
|                                                                      |                      |       | Female | 2.5   | 2.0  | 1.5    | 1.0   | 1.14  | >0.1  | Treatment             |
|                                                                      | Decaffeinated coffee | Young | Male   | 5.8   | 2.0  | 3.5    | 1.7   | 10.96 | 0.002 | Age                   |
|                                                                      |                      |       | Female | 5.5   | 2.2  | 2.8    | 2.3   | 2.48  | >0.1  | Sex                   |
|                                                                      |                      | Older | Male   | 3.0   | 1.7  | 2.3    | 1.3   | 2.13  | >0.1  | Treatment * Age       |
|                                                                      |                      |       | Female | 3.1   | 1.6  | 2.0    | 1.4   | 0.22  | >0.1  | Treatment * Sex       |
|                                                                      | Caffeinated coffee   | Young | Male   | 5.4   | 1.8  | 3.9    | 1.9   | 0.91  | >0.1  | Treatment * Age * Sex |
|                                                                      |                      |       | Female | 5.7   | 2.3  | 3.0    | 2.1   |       |       |                       |
|                                                                      |                      | Older | Male   | 2.9   | 2.1  | 1.1    | 1.1   |       |       |                       |
|                                                                      |                      |       | Female | 3.4   | 1.9  | 1.6    | 1.6   |       |       |                       |
| Delayed word recall error (number) [Episodic memory]                 | Placebo              | Young | Male   | 0.6   | 0.6  | 0.7    | 0.9   |       |       |                       |
|                                                                      |                      |       | Female | 0.7   | 1.4  | 1.3    | 1.1   |       |       |                       |
|                                                                      |                      | Older | Male   | 1.4   | 1.3  | 1.7    | 1.5   |       |       |                       |
|                                                                      |                      |       | Female | 1.3   | 1.3  | 1.9    | 1.6   | 0.49  | >0.1  | Treatment             |
|                                                                      | Decaffeinated coffee | Young | Male   | 0.2   | 0.4  | 0.9    | 0.8   | 3.35  | 0.072 | Age                   |
|                                                                      |                      |       | Female | 0.6   | 0.8  | 1.7    | 2.2   | 6.01  | 0.018 | Sex                   |
|                                                                      |                      | Older | Male   | 1.9   | 1.3  | 1.9    | 1.8   | 1.52  | >0.1  | Treatment * Age       |
|                                                                      |                      |       | Female | 1.5   | 1.3  | 2.1    | 1.2   | 0.54  | >0.1  | Treatment * Sex       |
|                                                                      | Caffeinated coffee   | Young | Male   | 0.9   | 0.9  | 0.8    | 1.3   | 0.80  | >0.1  | Treatment * Age * Sex |
|                                                                      |                      |       | Female | 0.4   | 0.7  | 0.9    | 1.0   |       |       |                       |
|                                                                      |                      | Older | Male   | 1.6   | 1.5  | 1.5    | 1.9   |       |       |                       |
|                                                                      |                      |       | Female | 1.1   | 1.5  | 2.5    | 1.5   |       |       |                       |
| Picture recognition accuracy (%) [Episodic memory]                   | Placebo              | Young | Male   | 87.9  | 10.5 | 88.33  | 8.35  |       |       |                       |
|                                                                      |                      |       | Female | 88.2  | 11.8 | 89.49  | 9.31  |       |       |                       |
|                                                                      |                      | Older | Male   | 94.5  | 8.6  | 94.76  | 8.84  |       |       |                       |
|                                                                      |                      |       | Female | 97.1  | 3.6  | 95.21  | 4.71  | 0.10  | >0.1  | Treatment             |
|                                                                      | Decaffeinated coffee | Young | Male   | 90.2  | 9.7  | 91.88  | 5.44  | 6.56  | 0.014 | Age                   |
|                                                                      |                      |       | Female | 91.7  | 8.6  | 90.00  | 9.43  | 0.26  | >0.1  | Sex                   |
|                                                                      |                      | Older | Male   | 93.3  | 8.3  | 93.57  | 8.21  | 0.13  | >0.1  | Treatment * Age       |
|                                                                      |                      |       | Female | 98.3  | 3.0  | 96.67  | 4.56  | 0.36  | >0.1  | Treatment * Sex       |
|                                                                      | Caffeinated coffee   | Young | Male   | 89.0  | 8.8  | 91.25  | 5.56  | 1.60  | >0.1  | Treatment * Age * Sex |
|                                                                      |                      |       | Female | 92.1  | 6.3  | 88.06  | 9.04  |       |       |                       |
|                                                                      |                      | Older | Male   | 93.8  | 7.0  | 94.05  | 7.06  |       |       |                       |
|                                                                      |                      |       | Female | 97.5  | 3.8  | 96.67  | 3.65  |       |       |                       |

|                                                                         |                         |       |        |        |       |         |        |       |        |                 |
|-------------------------------------------------------------------------|-------------------------|-------|--------|--------|-------|---------|--------|-------|--------|-----------------|
| Picture<br>recognition<br>reaction time<br>(ms)<br>[Episodic<br>memory] | Placebo                 | Young | Male   | 748.0  | 97.3  | 741.57  | 97.71  | 0.33  | >0.1   | Treatment       |
|                                                                         |                         |       | Female | 706.4  | 105.7 | 662.37  | 67.66  |       |        |                 |
|                                                                         |                         | Older | Male   | 943.5  | 142.7 | 966.58  | 159.84 |       |        |                 |
|                                                                         |                         |       | Female | 823.2  | 103.8 | 841.40  | 94.64  |       |        |                 |
|                                                                         | Decaffeinated<br>coffee | Young | Male   | 739.3  | 81.2  | 743.00  | 87.74  | 25.18 | <0.001 | Age             |
|                                                                         |                         |       | Female | 700.8  | 73.9  | 692.10  | 94.36  |       |        |                 |
|                                                                         |                         | Older | Male   | 923.6  | 96.8  | 955.00  | 151.51 |       |        |                 |
|                                                                         |                         |       | Female | 799.0  | 114.5 | 845.84  | 115.64 |       |        |                 |
|                                                                         | Caffeinated<br>coffee   | Young | Male   | 752.3  | 83.3  | 769.46  | 130.38 | 0.26  | >0.1   | Treatment * Age |
|                                                                         |                         |       | Female | 689.0  | 103.8 | 670.53  | 84.91  |       |        |                 |
|                                                                         |                         | Older | Male   | 918.2  | 121.3 | 978.97  | 234.24 |       |        |                 |
|                                                                         |                         |       | Female | 858.8  | 120.1 | 830.36  | 73.80  |       |        |                 |
| Word<br>recognition<br>accuracy (%)<br>[Episodic<br>memory]             | Placebo                 | Young | Male   | 77.7   | 8.9   | 77.92   | 11.73  | 0.90  | >0.1   | Treatment       |
|                                                                         |                         |       | Female | 80.0   | 10.7  | 77.18   | 8.59   |       |        |                 |
|                                                                         |                         | Older | Male   | 72.4   | 8.1   | 73.57   | 10.08  |       |        |                 |
|                                                                         |                         |       | Female | 75.8   | 10.8  | 73.54   | 11.38  |       |        |                 |
|                                                                         | Decaffeinated<br>coffee | Young | Male   | 77.3   | 9.3   | 76.04   | 7.91   | 0.68  | >0.1   | Age             |
|                                                                         |                         |       | Female | 78.3   | 8.0   | 73.33   | 9.43   |       |        |                 |
|                                                                         |                         | Older | Male   | 74.0   | 8.4   | 72.86   | 8.26   |       |        |                 |
|                                                                         |                         |       | Female | 75.8   | 8.1   | 72.08   | 10.17  |       |        |                 |
|                                                                         | Caffeinated<br>coffee   | Young | Male   | 83.1   | 8.4   | 79.38   | 10.05  | 0.43  | >0.1   | Sex             |
|                                                                         |                         |       | Female | 77.4   | 7.7   | 71.02   | 11.42  |       |        |                 |
|                                                                         |                         | Older | Male   | 74.3   | 12.4  | 73.57   | 11.58  |       |        |                 |
|                                                                         |                         |       | Female | 76.2   | 8.3   | 73.12   | 7.65   |       |        |                 |
| Word<br>recognition<br>reaction time<br>(ms)<br>[Episodic<br>memory]    | Placebo                 | Young | Male   | 748.4  | 139.6 | 737.93  | 107.79 | 0.23  | >0.1   | Treatment       |
|                                                                         |                         |       | Female | 725.6  | 125.1 | 701.29  | 126.74 |       |        |                 |
|                                                                         |                         | Older | Male   | 1060.1 | 182.2 | 1050.35 | 169.44 |       |        |                 |
|                                                                         |                         |       | Female | 929.0  | 161.0 | 937.51  | 136.27 |       |        |                 |
|                                                                         | Decaffeinated<br>coffee | Young | Male   | 795.4  | 174.1 | 808.41  | 162.71 | 44.17 | <0.001 | Age             |
|                                                                         |                         |       | Female | 696.9  | 121.6 | 700.36  | 144.09 |       |        |                 |
|                                                                         |                         | Older | Male   | 1003.4 | 171.9 | 947.71  | 141.21 |       |        |                 |
|                                                                         |                         |       | Female | 915.1  | 144.9 | 942.25  | 119.39 |       |        |                 |
|                                                                         | Caffeinated<br>coffee   | Young | Male   | 822.9  | 233.7 | 790.12  | 118.26 | 2.24  | 0.091  | Sex             |
|                                                                         |                         |       | Female | 700.3  | 107.6 | 668.58  | 108.11 |       |        |                 |
|                                                                         |                         | Older | Male   | 989.6  | 139.2 | 1032.38 | 129.53 |       |        |                 |
|                                                                         |                         |       | Female | 997.8  | 218.7 | 972.72  | 118.09 |       |        |                 |
| Computerised<br>location<br>learning recall<br>(number)<br>(Learning)   | Placebo                 | Young | Male   | 0.6    | 2.0   | 1.4     | 2.7    | 0.16  | >0.1   | Treatment       |
|                                                                         |                         |       | Female | 0.2    | 0.6   | 0.2     | 0.6    |       |        |                 |
|                                                                         |                         | Older | Male   | 2.3    | 3.8   | 2.4     | 2.8    |       |        |                 |
|                                                                         |                         |       | Female | 4.5    | 6.9   | 2.9     | 5.5    |       |        |                 |
|                                                                         | Decaffeinated<br>coffee | Young | Male   | 0.6    | 2.0   | 0.3     | 0.7    | 2.43  | >0.1   | Age             |
|                                                                         |                         |       | Female | 0.2    | 0.6   | 1.0     | 1.9    |       |        |                 |
|                                                                         |                         | Older | Male   | 2.3    | 3.8   | 2.3     | 4.2    |       |        |                 |
|                                                                         |                         |       | Female | 4.5    | 6.9   | 2.3     | 3.9    |       |        |                 |
|                                                                         | Caffeinated<br>coffee   | Young | Male   | 0.6    | 2.0   | 0.8     | 1.3    | 0.51  | >0.1   | Sex             |
|                                                                         |                         |       | Female | 0.2    | 0.6   | 1.4     | 3.1    |       |        |                 |
|                                                                         |                         | Older | Male   | 2.3    | 3.8   | 1.7     | 2.8    |       |        |                 |
|                                                                         |                         |       | Female | 4.5    | 6.9   | 2.9     | 4.4    |       |        |                 |
| Computerised<br>location                                                | Placebo                 | Young | Male   | -0.2   | 0.5   | -1.3    | 2.8    | 0.67  | >0.1   | Treatment       |
|                                                                         |                         |       | Female | -0.1   | 0.3   | 0.0     | 0.0    |       |        |                 |
|                                                                         |                         | Older | Male   | -0.4   | 1.3   | -1.3    | 3.5    |       |        |                 |
|                                                                         |                         |       | Female | -3.0   | 5.2   | 0.1     | 1.8    |       |        |                 |

|                                                                  |                         |       |        |      |     |      |     |      |       |                       |
|------------------------------------------------------------------|-------------------------|-------|--------|------|-----|------|-----|------|-------|-----------------------|
| learning decay<br>(number)<br>(Learning)                         | Decaffeinated<br>coffee | Young | Male   | -0.2 | 0.5 | -0.1 | 0.5 | 0.00 | >0.1  | Age                   |
|                                                                  |                         |       | Female | -0.1 | 0.3 | -0.8 | 1.7 | 0.07 | >0.1  | Sex                   |
|                                                                  |                         | Older | Male   | -0.4 | 1.3 | -0.5 | 1.7 | 0.07 | >0.1  | Treatment * Age       |
|                                                                  |                         |       | Female | -3.0 | 5.2 | -0.9 | 3.5 | 3.46 | 0.035 | Treatment * Sex       |
|                                                                  | Caffeinated<br>coffee   | Young | Male   | -0.2 | 0.5 | -0.7 | 1.1 | 0.07 | >0.1  | Treatment * Age * Sex |
|                                                                  |                         |       | Female | -0.1 | 0.3 | -1.2 | 3.1 |      |       |                       |
|                                                                  |                         | Older | Male   | -0.4 | 1.3 | -0.6 | 1.4 |      |       |                       |
|                                                                  |                         |       | Female | -3.0 | 5.2 | -1.6 | 4.4 |      |       |                       |
| Driving<br>simulation<br>errors<br>(number)<br>[Driving ability] | Placebo                 | Young | Male   | 0.2  | 0.4 | 0.2  | 0.4 |      |       |                       |
|                                                                  |                         |       | Female | 0.9  | 0.9 | 0.8  | 1.1 |      |       |                       |
|                                                                  |                         | Older | Male   | 1.5  | 1.8 | 1.4  | 2.0 |      |       |                       |
|                                                                  |                         |       | Female | 1.3  | 1.2 | 1.3  | 1.4 | 1.16 | >0.1  | Treatment             |
|                                                                  | Decaffeinated<br>coffee | Young | Male   | 0.2  | 0.4 | 0.3  | 0.6 | 4.11 | 0.048 | Age                   |
|                                                                  |                         |       | Female | 0.9  | 0.9 | 0.5  | 0.5 | 1.01 | >0.1  | Sex                   |
|                                                                  |                         | Older | Male   | 1.5  | 1.8 | 0.9  | 0.8 | 0.43 | >0.1  | Treatment * Age       |
|                                                                  |                         |       | Female | 1.3  | 1.2 | 0.9  | 1.0 | 0.66 | >0.1  | Treatment * Sex       |
|                                                                  | Caffeinated<br>coffee   | Young | Male   | 0.2  | 0.4 | 0.1  | 0.4 | 0.67 | >0.1  | Treatment * Age * Sex |
|                                                                  |                         |       | Female | 0.9  | 0.9 | 0.5  | 0.9 |      |       |                       |
|                                                                  |                         | Older | Male   | 1.5  | 1.8 | 0.8  | 0.8 |      |       |                       |
|                                                                  |                         |       | Female | 1.3  | 1.2 | 1.4  | 1.7 |      |       |                       |

Supplementary table 3 - Unadjusted mood scores

| Task    | Treatment            | Age   | Sex    | Baseline |      | Post-dose |      | F     | p      |                       |
|---------|----------------------|-------|--------|----------|------|-----------|------|-------|--------|-----------------------|
|         |                      |       |        | Mean     | SD   | Mean      | SD   |       |        |                       |
| Relaxed | Placebo              | Young | Male   | 64.1     | 13.7 | 56.9      | 14.1 | 0.87  | >0.1   | Treatment             |
|         |                      |       | Female | 57.8     | 15.1 | 51.0      | 16.5 |       |        |                       |
|         |                      | Older | Male   | 71.4     | 22.7 | 64.2      | 19.1 |       |        |                       |
|         |                      |       | Female | 58.5     | 19.0 | 43.0      | 18.1 |       |        |                       |
|         | Decaffeinated coffee | Young | Male   | 64.2     | 10.9 | 62.6      | 11.5 | 1.19  | >0.1   | Age                   |
|         |                      |       | Female | 59.5     | 10.6 | 50.8      | 13.7 | 4.93  | 0.030  | Sex                   |
|         |                      | Older | Male   | 73.4     | 15.2 | 63.7      | 21.1 | 0.75  | >0.1   | Treatment * Age       |
|         |                      |       | Female | 57.8     | 15.2 | 49.2      | 17.9 | 1.06  | >0.1   | Treatment * Sex       |
|         | Caffeinated coffee   | Young | Male   | 56.4     | 17.2 | 58.1      | 11.3 | 2.04  | >0.1   | Treatment * Age * Sex |
|         |                      |       | Female | 59.8     | 13.4 | 53.5      | 13.3 |       |        |                       |
|         |                      | Older | Male   | 71.9     | 17.3 | 57.4      | 24.1 |       |        |                       |
|         |                      |       | Female | 55.4     | 14.8 | 47.6      | 17.0 |       |        |                       |
| Alert   | Placebo              | Young | Male   | 53.6     | 16.4 | 51.2      | 13.3 | 9.86  | <0.001 | Treatment             |
|         |                      |       | Female | 50.5     | 20.6 | 50.6      | 16.6 |       |        |                       |
|         |                      | Older | Male   | 74.3     | 14.9 | 63.4      | 20.8 |       |        |                       |
|         |                      |       | Female | 59.3     | 15.5 | 46.0      | 14.3 |       |        |                       |
|         | Decaffeinated coffee | Young | Male   | 56.1     | 12.3 | 62.4      | 10.1 | 1.08  | >0.1   | Age                   |
|         |                      |       | Female | 51.5     | 14.7 | 55.1      | 19.1 | 3.01  | 0.088  | Sex                   |
|         |                      | Older | Male   | 72.0     | 14.5 | 67.3      | 19.4 | 0.63  | >0.1   | Treatment * Age       |
|         |                      |       | Female | 57.8     | 12.0 | 52.4      | 12.9 | 1.86  | >0.1   | Treatment * Sex       |
|         | Caffeinated coffee   | Young | Male   | 48.9     | 13.3 | 60.4      | 9.4  | 1.14  | >0.1   | Treatment * Age * Sex |
|         |                      |       | Female | 55.5     | 14.9 | 63.2      | 8.2  |       |        |                       |
|         |                      | Older | Male   | 71.4     | 14.3 | 63.4      | 19.9 |       |        |                       |
|         |                      |       | Female | 56.7     | 14.9 | 57.0      | 11.6 |       |        |                       |
| Jittery | Placebo              | Young | Male   | 25.8     | 13.8 | 32.8      | 19.1 | 2.98  | 0.055  | Treatment             |
|         |                      |       | Female | 28.2     | 20.1 | 29.0      | 16.1 |       |        |                       |
|         |                      | Older | Male   | 15.1     | 11.2 | 20.5      | 16.6 |       |        |                       |
|         |                      |       | Female | 28.8     | 21.0 | 31.7      | 19.6 |       |        |                       |
|         | Decaffeinated coffee | Young | Male   | 29.3     | 17.8 | 36.4      | 16.8 | 1.57  | >0.1   | Age                   |
|         |                      |       | Female | 27.2     | 17.9 | 29.8      | 19.4 | 0.17  | >0.1   | Sex                   |
|         |                      | Older | Male   | 19.3     | 11.4 | 18.4      | 11.0 | 0.28  | >0.1   | Treatment * Age       |
|         |                      |       | Female | 23.6     | 18.5 | 30.6      | 21.3 | 0.23  | >0.1   | Treatment * Sex       |
|         | Caffeinated coffee   | Young | Male   | 31.3     | 20.2 | 35.8      | 17.5 | 3.01  | 0.035  | Treatment * Age * Sex |
|         |                      |       | Female | 23.5     | 14.0 | 37.5      | 19.0 |       |        |                       |
|         |                      | Older | Male   | 16.6     | 17.2 | 27.5      | 18.9 |       |        |                       |
|         |                      |       | Female | 25.9     | 13.6 | 30.6      | 22.0 |       |        |                       |
| Tired   | Placebo              | Young | Male   | 50.3     | 14.5 | 51.7      | 14.8 | 12.31 | <0.001 | Treatment             |
|         |                      |       | Female | 47.0     | 24.5 | 46.8      | 23.8 |       |        |                       |
|         |                      | Older | Male   | 16.9     | 12.6 | 23.2      | 14.0 |       |        |                       |
|         |                      |       | Female | 38.8     | 22.7 | 44.8      | 17.9 |       |        |                       |
|         | Decaffeinated coffee | Young | Male   | 47.3     | 18.9 | 43.0      | 13.1 | 0.50  | >0.1   | Age                   |
|         |                      |       | Female | 46.3     | 20.9 | 44.9      | 28.9 | 0.97  | >0.1   | Sex                   |
|         |                      | Older | Male   | 23.9     | 17.2 | 27.1      | 17.1 | 2.58  | 0.081  | Treatment * Age       |
|         |                      |       | Female | 39.0     | 20.1 | 41.4      | 20.0 | 1.14  | >0.1   | Treatment * Sex       |
|         | Caffeinated coffee   | Young | Male   | 48.7     | 17.8 | 37.1      | 14.5 | 1.39  | >0.1   | Treatment * Age * Sex |
|         |                      |       | Female | 47.8     | 22.9 | 32.1      | 17.6 |       |        |                       |
|         |                      | Older | Male   | 27.3     | 20.7 | 26.7      | 17.1 |       |        |                       |
|         |                      |       | Female | 40.8     | 20.3 | 35.9      | 14.8 |       |        |                       |
|         | Placebo              | Young | Male   | 32.4     | 16.0 | 33.9      | 19.0 |       |        |                       |

|                |                      |       |        |      |      |      |      |      |       |                       |
|----------------|----------------------|-------|--------|------|------|------|------|------|-------|-----------------------|
| Tense          | Decaffeinated coffee | Older | Female | 33.2 | 16.9 | 32.7 | 17.8 | 1.38 | >0.1  | Treatment             |
|                |                      |       | Male   | 20.3 | 15.9 | 26.5 | 13.8 |      |       |                       |
|                |                      | Young | Female | 37.3 | 20.6 | 45.5 | 20.2 |      |       |                       |
|                |                      |       | Male   | 34.3 | 16.5 | 30.9 | 15.6 |      |       |                       |
|                |                      |       | Female | 26.3 | 11.8 | 31.5 | 17.5 |      |       |                       |
|                |                      |       | Male   | 25.9 | 16.8 | 28.3 | 16.2 |      |       |                       |
|                | Caffeinated coffee   | Older | Female | 37.5 | 20.4 | 39.4 | 20.9 | 0.95 | >0.1  | Treatment * Sex       |
|                |                      |       | Male   | 33.1 | 18.6 | 34.9 | 18.2 |      |       |                       |
|                |                      | Young | Female | 32.8 | 16.0 | 38.3 | 18.4 |      |       |                       |
|                |                      |       | Male   | 25.6 | 14.9 | 32.0 | 21.8 |      |       |                       |
|                |                      |       | Female | 34.6 | 16.5 | 40.3 | 19.8 |      |       |                       |
|                |                      |       | Male   | 25.4 | 18.5 | 28.4 | 20.1 |      |       |                       |
| Headache       | Placebo              | Older | Female | 25.8 | 21.8 | 33.8 | 20.0 | 6.31 | 0.003 | Treatment             |
|                |                      |       | Male   | 12.9 | 17.7 | 15.1 | 18.6 |      |       |                       |
|                |                      | Young | Female | 11.8 | 19.8 | 22.4 | 21.8 |      |       |                       |
|                |                      |       | Male   | 22.4 | 17.2 | 27.1 | 18.1 |      |       |                       |
|                |                      |       | Female | 28.4 | 20.0 | 35.4 | 21.1 |      |       |                       |
|                |                      |       | Male   | 8.9  | 14.7 | 14.9 | 17.4 |      |       |                       |
|                | Decaffeinated coffee | Older | Female | 12.0 | 13.2 | 16.9 | 16.6 | 0.49 | >0.1  | Treatment * Sex       |
|                |                      |       | Male   | 35.1 | 24.7 | 27.6 | 21.1 |      |       |                       |
|                |                      | Young | Female | 32.5 | 22.2 | 30.6 | 21.1 |      |       |                       |
|                |                      |       | Male   | 7.6  | 13.3 | 7.9  | 10.4 |      |       |                       |
|                |                      |       | Female | 9.3  | 9.8  | 11.3 | 10.7 |      |       |                       |
|                |                      |       | Male   | 58.7 | 10.1 | 56.6 | 13.0 |      |       |                       |
| Overall mood   | Placebo              | Older | Female | 71.0 | 16.7 | 62.9 | 14.1 | 5.56 | 0.005 | Treatment             |
|                |                      |       | Male   | 73.6 | 17.3 | 68.3 | 16.7 |      |       |                       |
|                |                      | Young | Male   | 58.4 | 9.8  | 58.4 | 11.3 |      |       |                       |
|                |                      |       | Female | 61.7 | 13.2 | 61.5 | 14.1 |      |       |                       |
|                |                      |       | Male   | 72.4 | 16.9 | 69.5 | 16.4 |      |       |                       |
|                |                      |       | Female | 70.1 | 12.6 | 66.1 | 12.4 |      |       |                       |
|                | Decaffeinated coffee | Older | Female | 70.1 | 12.6 | 66.1 | 12.4 | 1.29 | >0.1  | Treatment * Sex       |
|                |                      |       | Male   | 57.4 | 12.7 | 60.5 | 13.3 |      |       |                       |
|                |                      | Young | Female | 57.0 | 11.9 | 61.5 | 16.5 |      |       |                       |
|                |                      |       | Male   | 75.2 | 14.7 | 69.8 | 17.7 |      |       |                       |
|                |                      |       | Female | 69.4 | 12.3 | 68.4 | 13.6 |      |       |                       |
|                |                      |       | Male   | 33.2 | 16.1 | 46.3 | 14.0 |      |       |                       |
| Mental fatigue | Placebo              | Older | Female | 27.6 | 17.8 | 43.1 | 14.6 | 4.43 | 0.014 | Treatment             |
|                |                      |       | Male   | 38.4 | 16.2 | 37.4 | 13.6 |      |       |                       |
|                |                      | Young | Female | 35.2 | 19.6 | 42.0 | 20.2 |      |       |                       |
|                |                      |       | Male   | 23.6 | 19.1 | 31.7 | 18.7 |      |       |                       |
|                |                      |       | Female | 33.6 | 17.9 | 42.4 | 16.8 |      |       |                       |
|                |                      |       | Male   | 41.2 | 16.7 | 38.0 | 13.4 |      |       |                       |
|                | Decaffeinated coffee | Older | Female | 32.2 | 17.7 | 35.0 | 14.0 | 1.71 | >0.1  | Treatment * Age * Sex |
|                |                      |       | Male   | 25.2 | 20.0 | 28.7 | 15.2 |      |       |                       |
|                |                      | Young | Female | 33.0 | 16.9 | 39.6 | 16.7 |      |       |                       |
|                |                      |       | Male   | 33.2 | 16.1 | 46.3 | 14.0 |      |       |                       |
|                |                      |       | Female | 36.8 | 22.0 | 43.4 | 16.3 |      |       |                       |
|                |                      |       | Male   | 17.9 | 16.4 | 28.9 | 14.2 |      |       |                       |
